# Supplementary material
Source: Research Square preprint supplement (doi:10.21203/rs.3.rs-9114727/v1)
Supplement: Supplementary file 1 [file 820e5acfb7a460cf1974247e.pdf]

**Supplementary material for**

**Microbial drivers of high aquaculture productivity: Decoupling of taxonomic and functional profiles enables efficient nitrogen cycling in greenhouse shrimp farming**

Hongye Shen<sup>1#</sup>, Liangxiao Ma<sup>1#</sup>, Jinshan Li<sup>1</sup>, Yongmei Hu<sup>1</sup>, Nan Peng<sup>1</sup>, Shumiao Zhao<sup>1#</sup>

<sup>1</sup>National Key Laboratory of Agricultural Microbiology and College of Life Science and Technology, Huazhong Agricultural University, Wuhan 430070, China

<sup>#</sup>Correspondence: [shumiaozhao@mail.hzau.edu.cn](mailto:shumiaozhao@mail.hzau.edu.cn) (Shumiao Zhao)

<sup>#</sup> These authors contributed equally to this work.

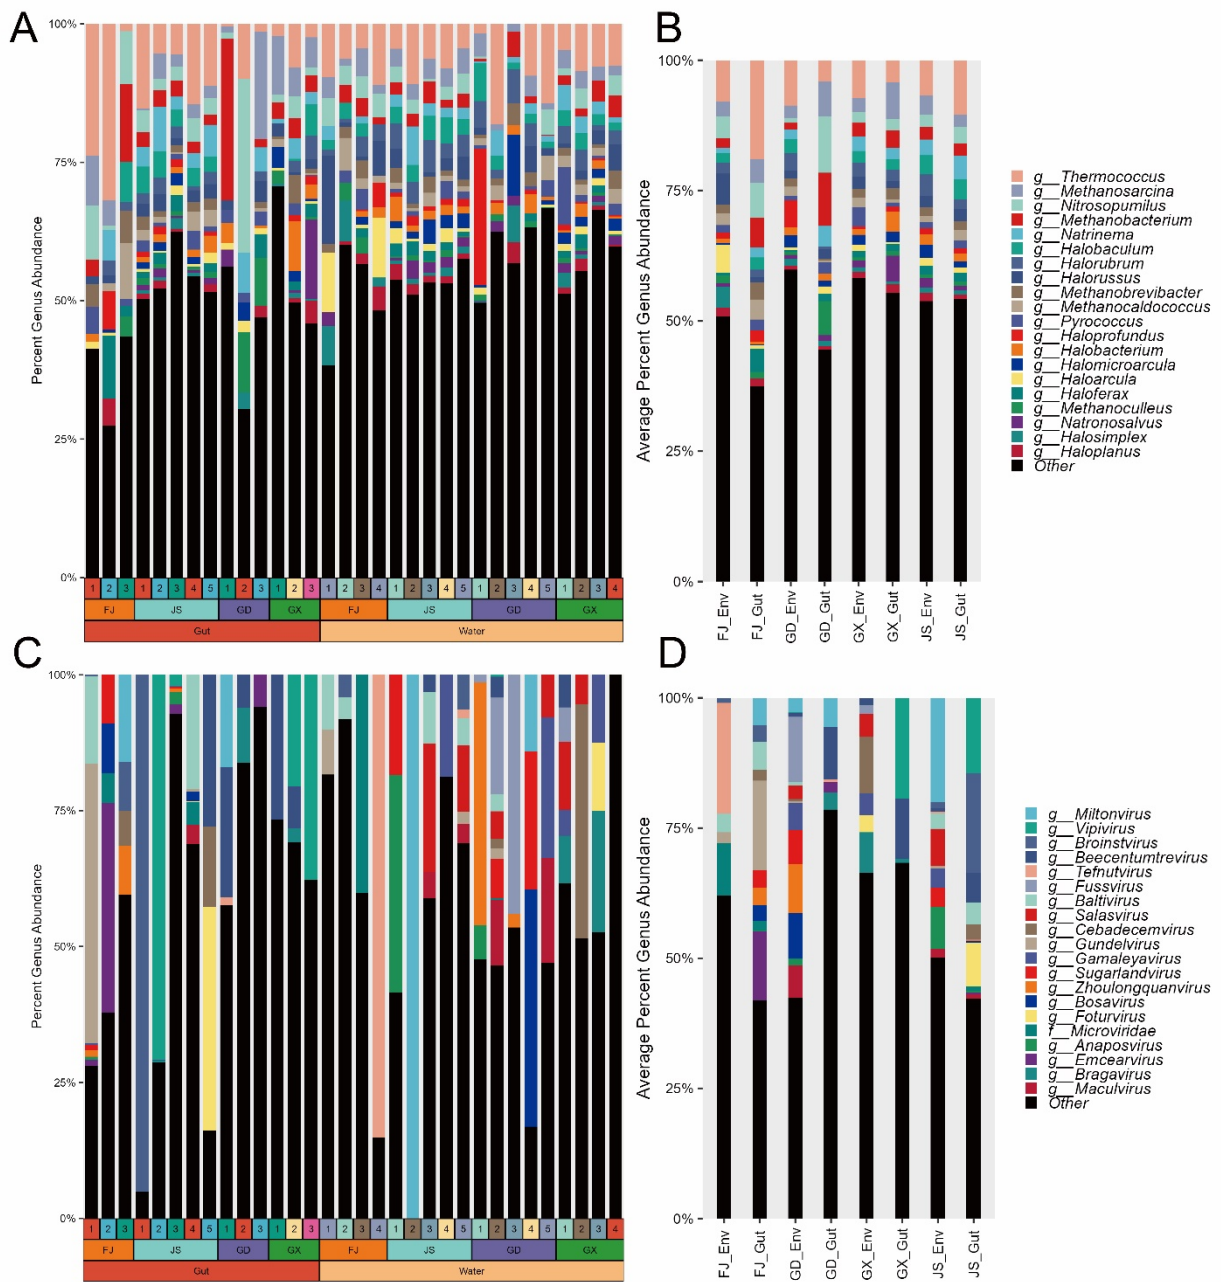

Fig. S1 Species composition abundance. (A) Archaeal microbial communities, (B) Viral microbial communities.

**A**

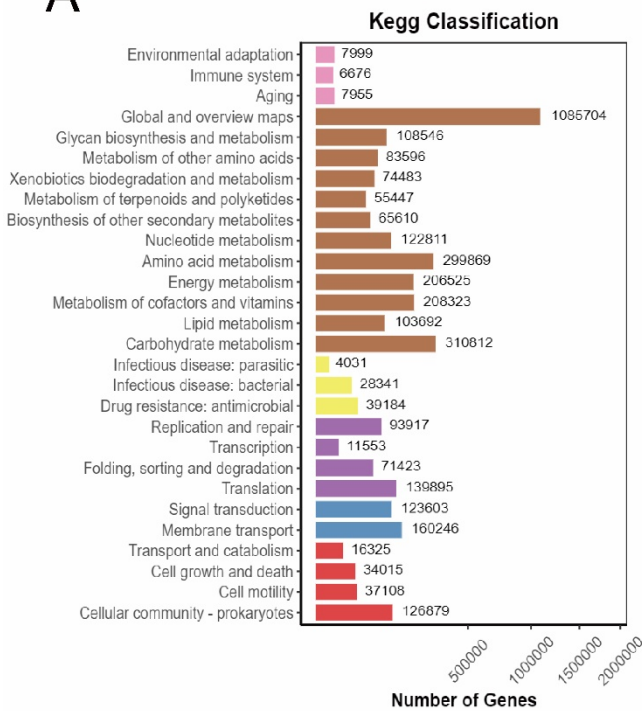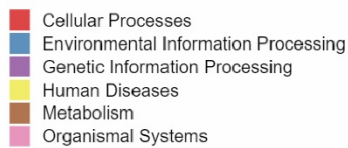

**B**

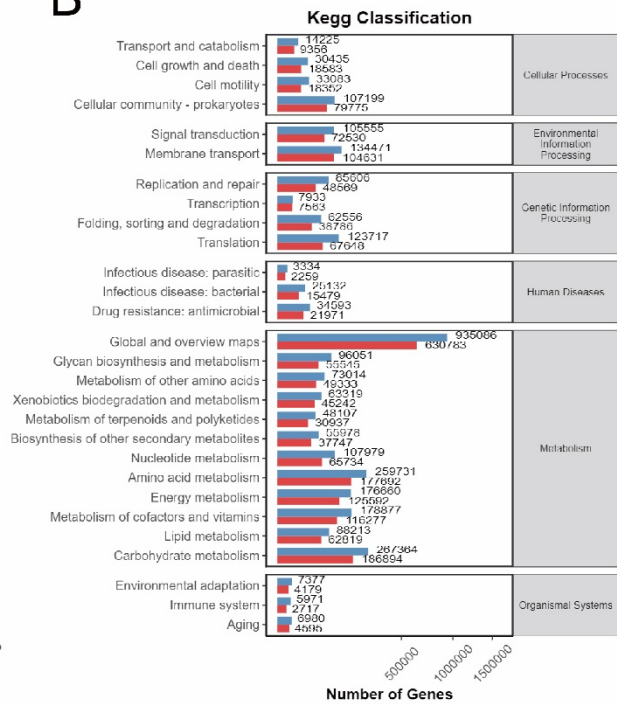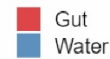

Fig. S2 Functional annotation results based on the KEGG database. (A) Categorized by sample region, (B) Categorized by sample type.

A

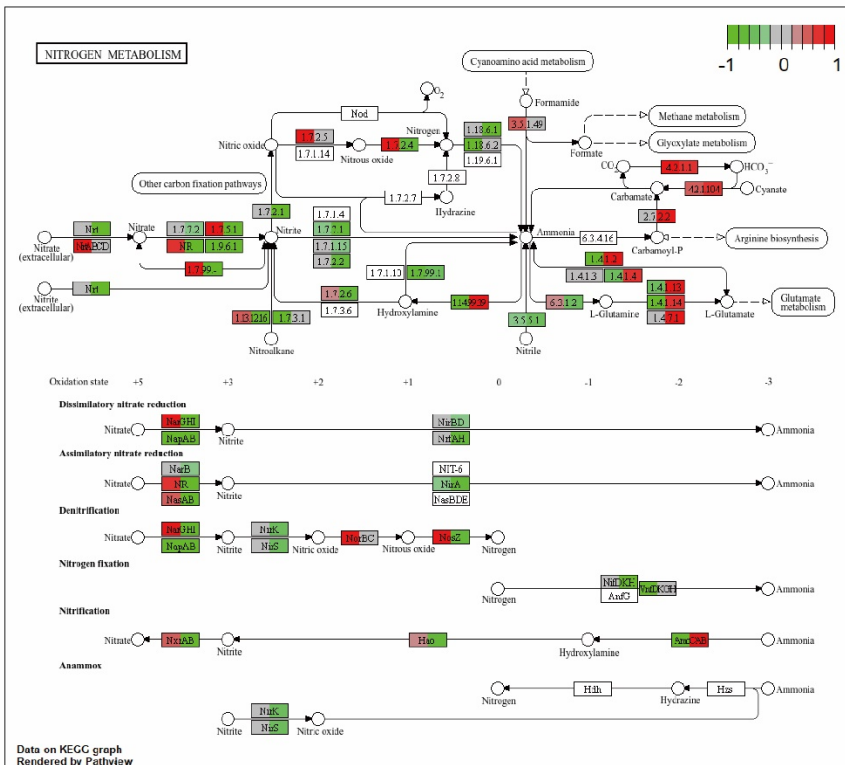

B

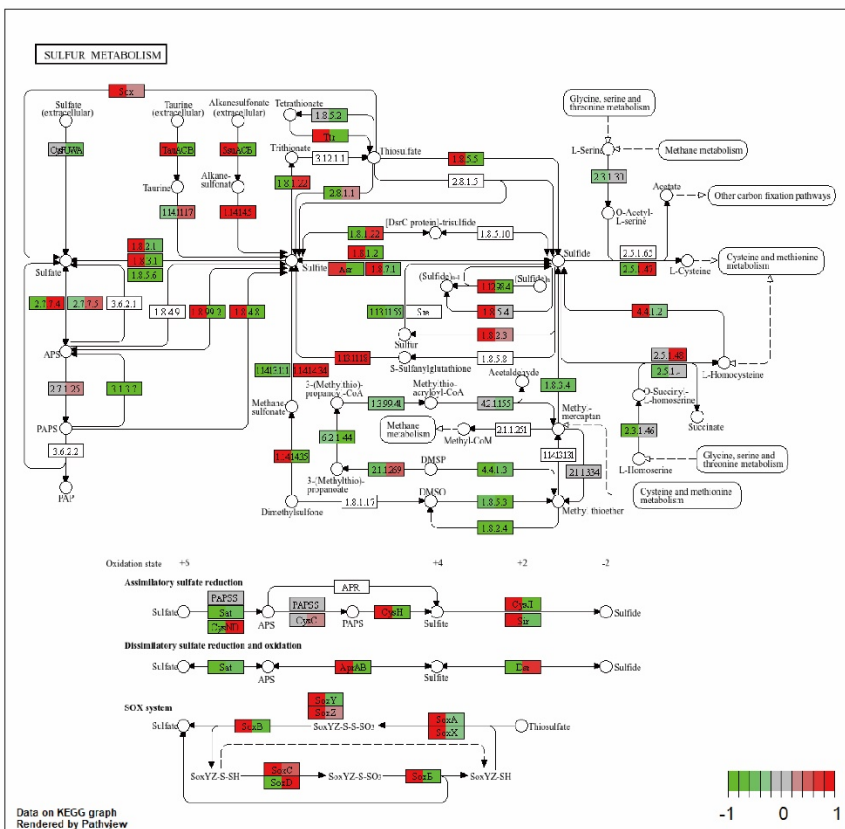

Fig. S3 Gene abundance annotation of biogeochemical cycling pathways by sample origin (former: gut samples; latter: aquatic environmental samples). (A) Nitrogen cycling pathways, (B) Sulfur cycling pathways.

A

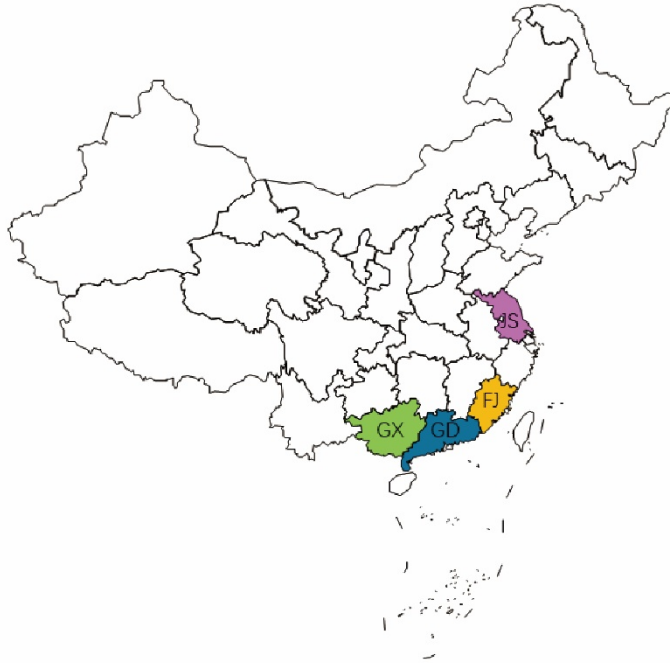

B

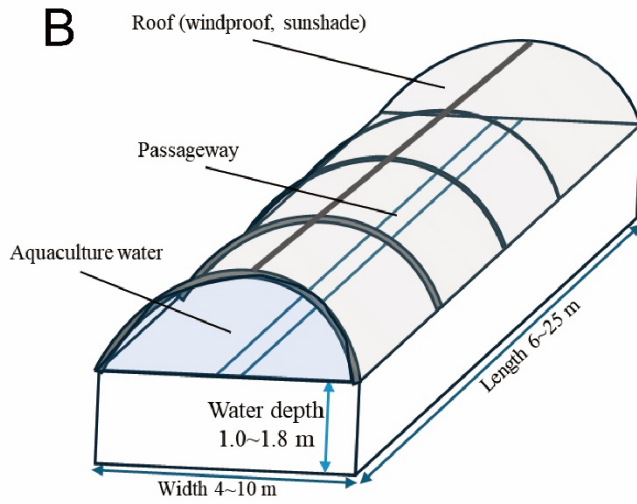

C

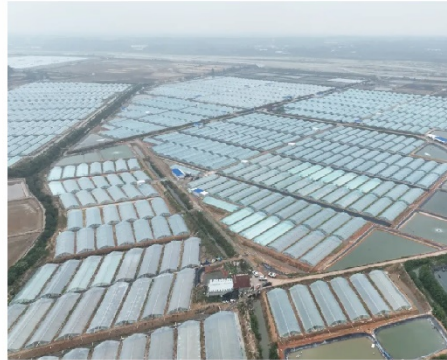

Fig. S4 Sampling information. (A) Sampling map, (B) Schematic diagram of aquaculture model, (C) Aerial view of aquaculture systems in sampling regions.
