# Supplementary material
Source: Research Square preprint supplement (doi:10.21203/rs.3.rs-9114727/v1)
Supplement: Supplementary file 2 [file da6e9a8ead6c7b5c7792472d.pdf]

# Microbiome Characterization of Greenhouse Shrimp Farming Systems (GSFM) in China

Regional Variations, Antibiotic Resistance Gene Distribution, and Functional Divergence in Nitrogen Metabolism, Relationship between water quality and shrimp growth.

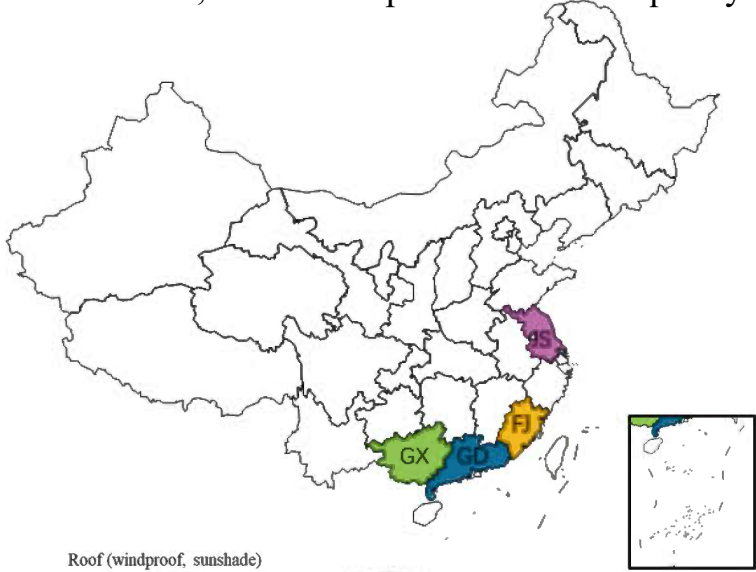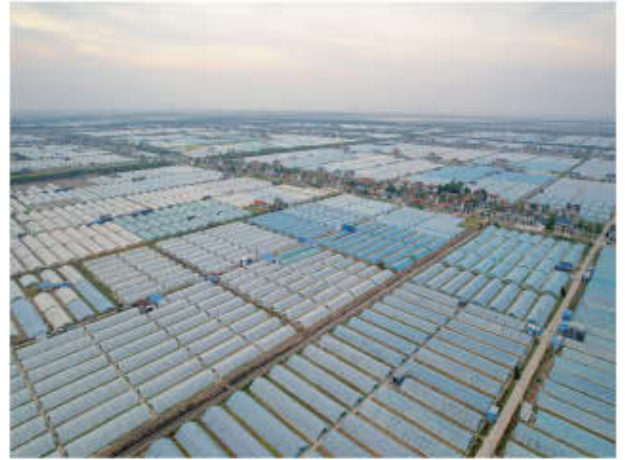

GSFM Origin——Rudong, Jiangsu

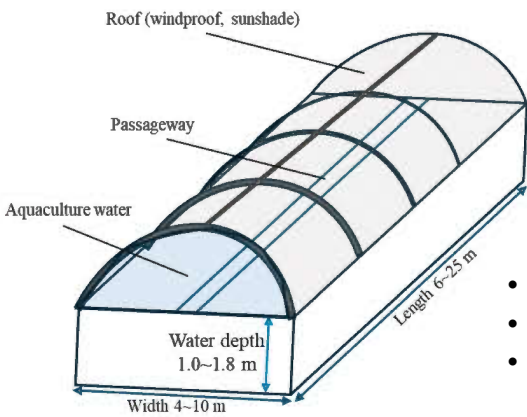

Schematic diagram of GSFM

- Weatherproof
- Heat preservation
- Oxygenation...

Sampling

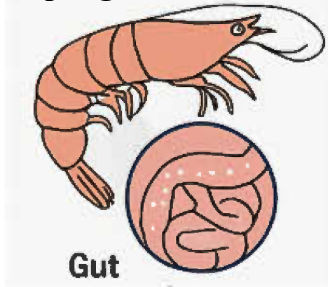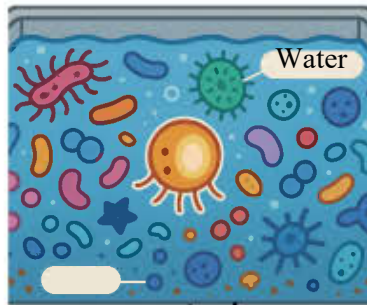

Metagenome sequencing

Water quality testing

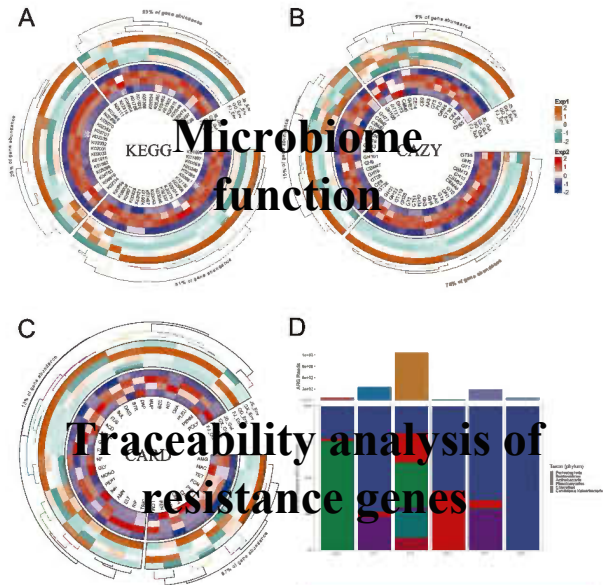

Primary hosts of resistance genes

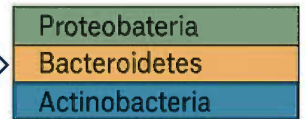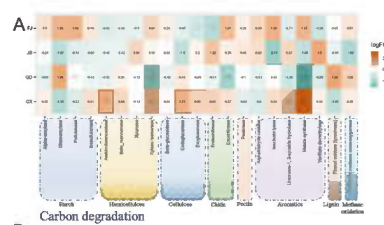

Relationship between water quality and shrimp growth

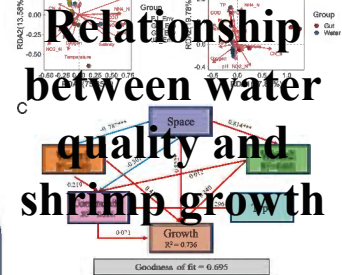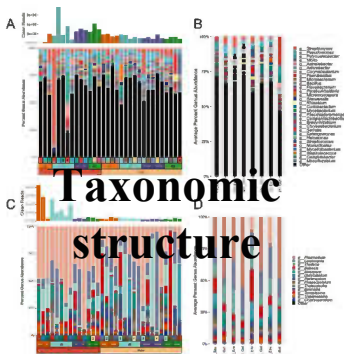

Taxonomic structure

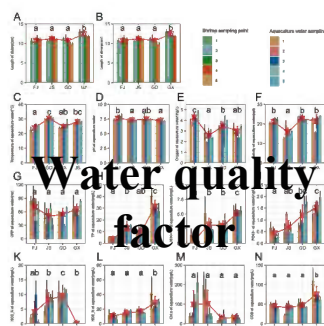

Water quality factor

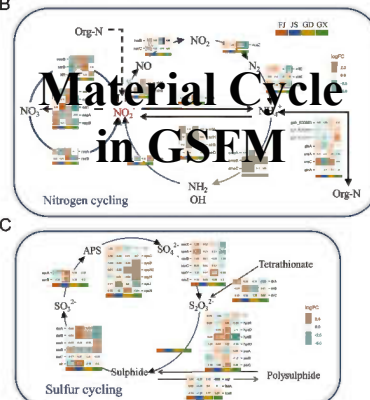

Material Cycle in GSFM

First comprehensive characterization of the GSFM microbiome in China.
